# Supplementary material for: Endoscopic Ultrasound-Guided Radiofrequency Ablation as an Future Alternative to Pancreatectomy for Pancreatic Metastases from Renal Cell Carcinoma: A Prospective Study
Source: MDPI journal article supplement (doi:10.3390/cancers13215267), 2021-10-20
Supplement: s1 [file s1]

Supp Figure S1 - Study detail

Supp Figure S2 - Time until progression for all treated PM. Sub-group analysis according to PM size

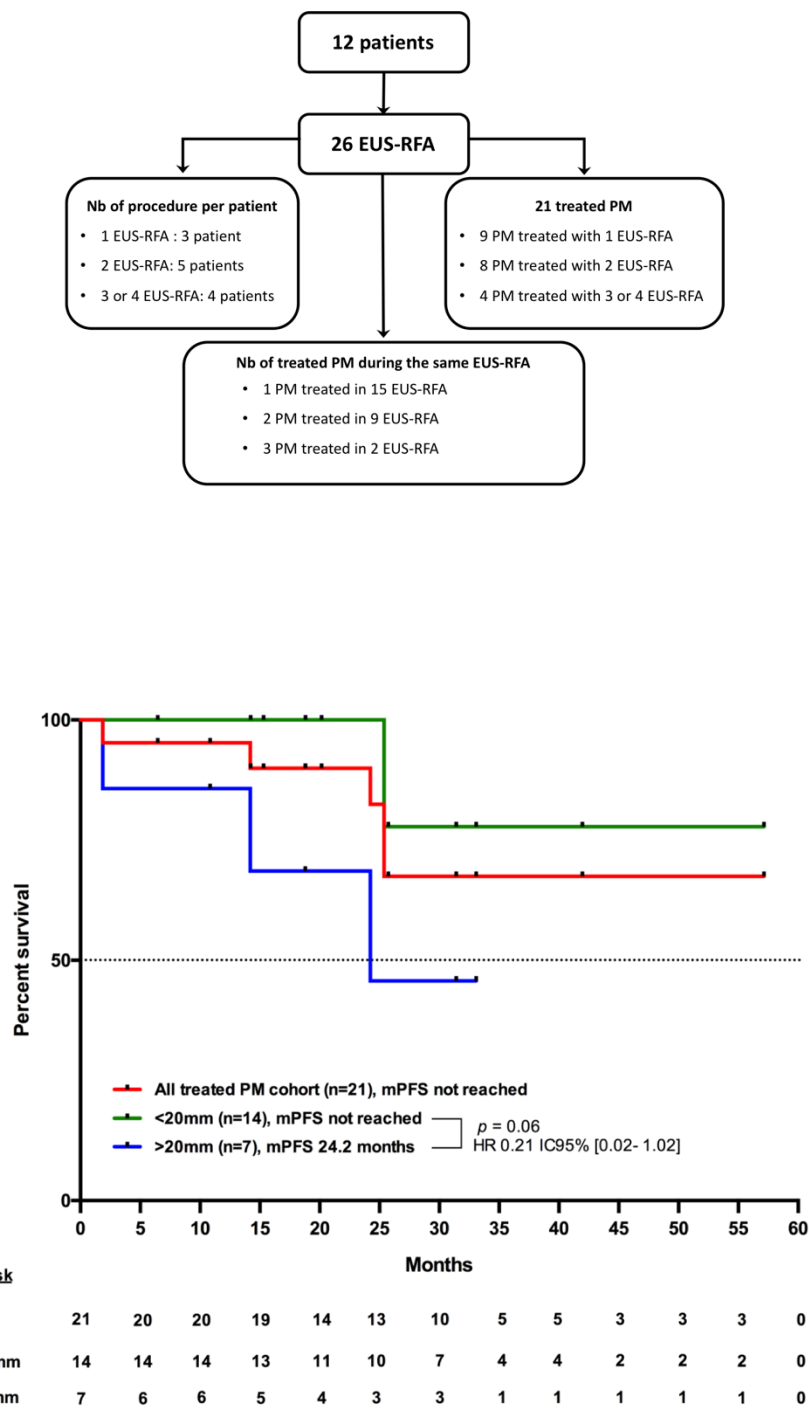

**Supp Table S1- EUS-RFA procedures characteristics**

| n = 26                                      |                  |     |            |
|---------------------------------------------|------------------|-----|------------|
| Median number of procedures per patient     | n (range)        | 2   | [1-4]      |
| Median time between procedures (months)     | n (range)        | 3.6 | [2.5-15.2] |
| Median Number of Procedures per PM          | All PM n (range) | 2   | [1-4]      |
|                                             | > 20mm n (range) | 1   | [1-4]      |
|                                             | ≤ 20mm n (range) | 1   | [1-2]      |
| Median number of PM treated in each EUS-RFA | n (range)        | 1   | [1-3]      |
| Post <b>EUS-RFA</b> severe Side Effects     | Immediate (n, %) | 0   | 0          |
|                                             | Delayed (n, %)   | 2   | 8          |

**SuppTable S2: Focal control at 2, 6 and 12 months according to PM size**

|                           | < 20mm (%) (n=14) |      |       | > 20mm (%) (n=7) |      |       |
|---------------------------|-------------------|------|-------|------------------|------|-------|
|                           | 2mo.              | 6mo. | 12mo. | 2mo.             | 6mo. | 12mo. |
| <b>FOCAL CONTROL RATE</b> | 92,9              | 91.7 | 72.7  | 85.7             | 71.4 | 75    |
| <b>COMPLETE RESPONSE</b>  | 28,6              | 33.3 | 45.5  | 43.9             | 14.3 | 25    |
| <b>PROGRESSION</b>        | 7.1               | 8.3  | 27.3  | 14.3             | 28.6 | 25    |
| <b>NOT EVALUABLE</b>      | 0.0               | 14.3 | 21.4  | 0.0              | 0.0  | 42.9  |

PM: pancreatic metastasis CR: complete response, PR: partial response, SD: stable disease PD: progression

disease, mo.: Months

Focal Control Rate = CR + PR +SD

**Supp Table S3: Logistic regression of variables potentially associated with 6-months objective response.**

|                                                                     | 6 months Response |         |
|---------------------------------------------------------------------|-------------------|---------|
|                                                                     | OR (95%IC)        | P-value |
| <b>Age</b><br>(for 5 years)                                         | 1.44 (0.39-6.17)  | 0.57    |
| <b>Sex</b><br>(male vs female)                                      | 0.50 (0.07-3.13)  | 0.46    |
| <b>Tumor Localization</b><br>(tail vs body)<br>(head-uncus vs body) | 0.50 (0.03-6.95)  | 0.60    |
|                                                                     | 0.62 (0.06-5.22)  | 0.66    |
| <b>Tumor size</b><br>(≥20mm vs <20mm)                               | 0.37 (0.04-2.50)  | 0.31    |
| <b>IMDC</b><br>(Intermediate vs good)                               | 0.11 (0.009-0.92) | 0.057   |

IMDC= International Metastatic RCC Database Consortium; OR = Odds Ratio.
